# Supplementary material
Source: PubMed Central journal article supplement (PMC7168403)
Supplement: MEC-25-1192-s001.pdf [file MEC-25-1192-s001.pdf]

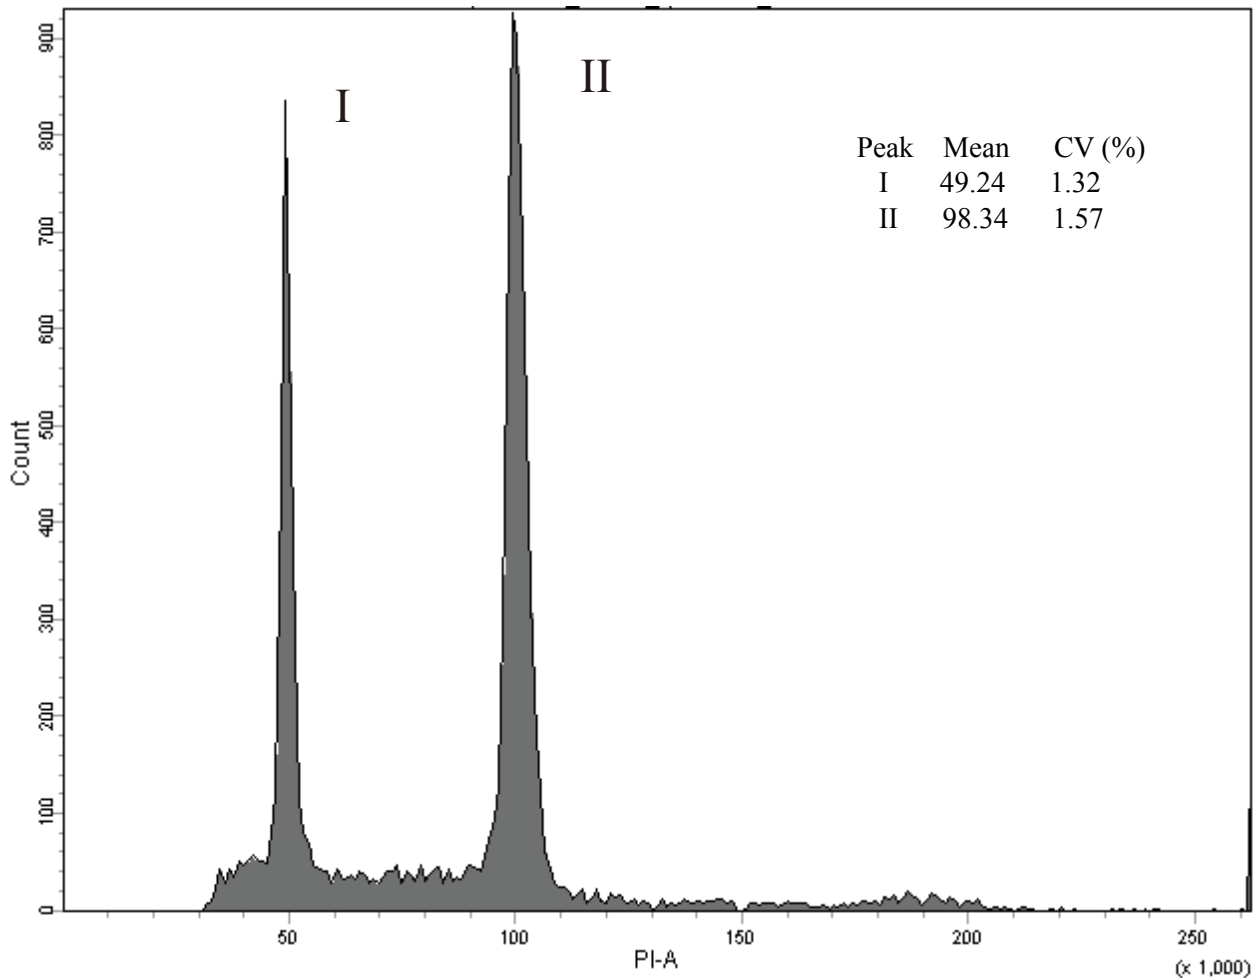

**Fig. S1** Histograms of fluorescence intensity in diploid *Ephedra equisetina* (I) and tetraploid *E. intermedia* (II). The peak position on the horizontal axis indicates the relative DNA content. Mean, mean peak position; CV (%), coefficients of variation.
