# Supplementary material
Source: PubMed Central journal article supplement (PMC7168403)
Supplement: MEC-25-1192-s003.pdf [file MEC-25-1192-s003.pdf]

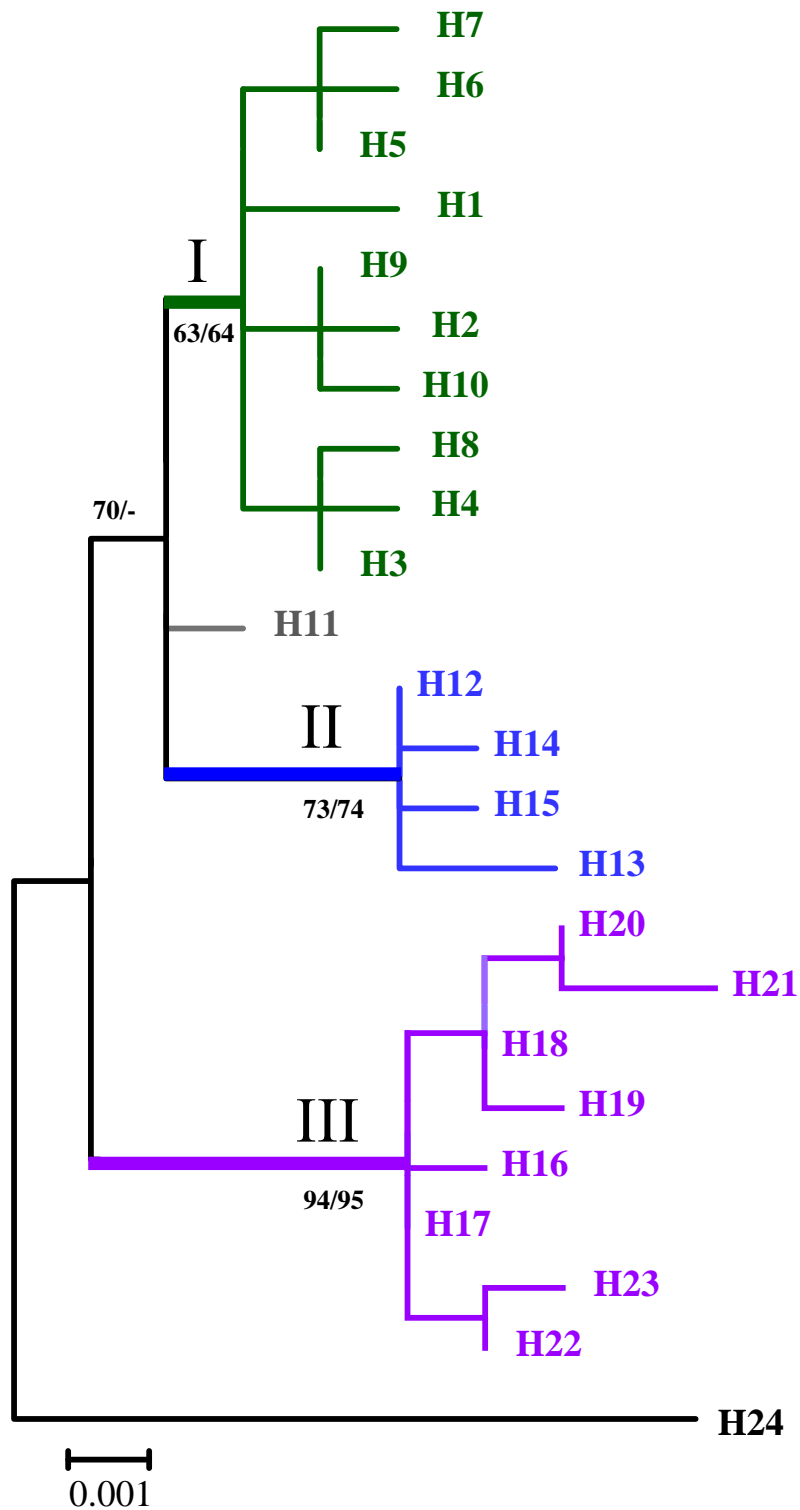

**Fig. S3.** The ML tree of *Ephedra* constructed by the cpDNA haplotypes. Numbers associated with branches are bootstrap percentages of MP and ML greater than 50%. Bold lines indicate Bayesian posterior probabilities greater than 0.90. Different colors indicate the three lineages in Fig. 2: green, lineage I; blue, lineage II; purple, lineage III; grey, H11.
