# Supplementary material
Source: PubMed Central journal article supplement (PMC7168403)
Supplement: MEC-25-1192-s005.pdf [file MEC-25-1192-s005.pdf]

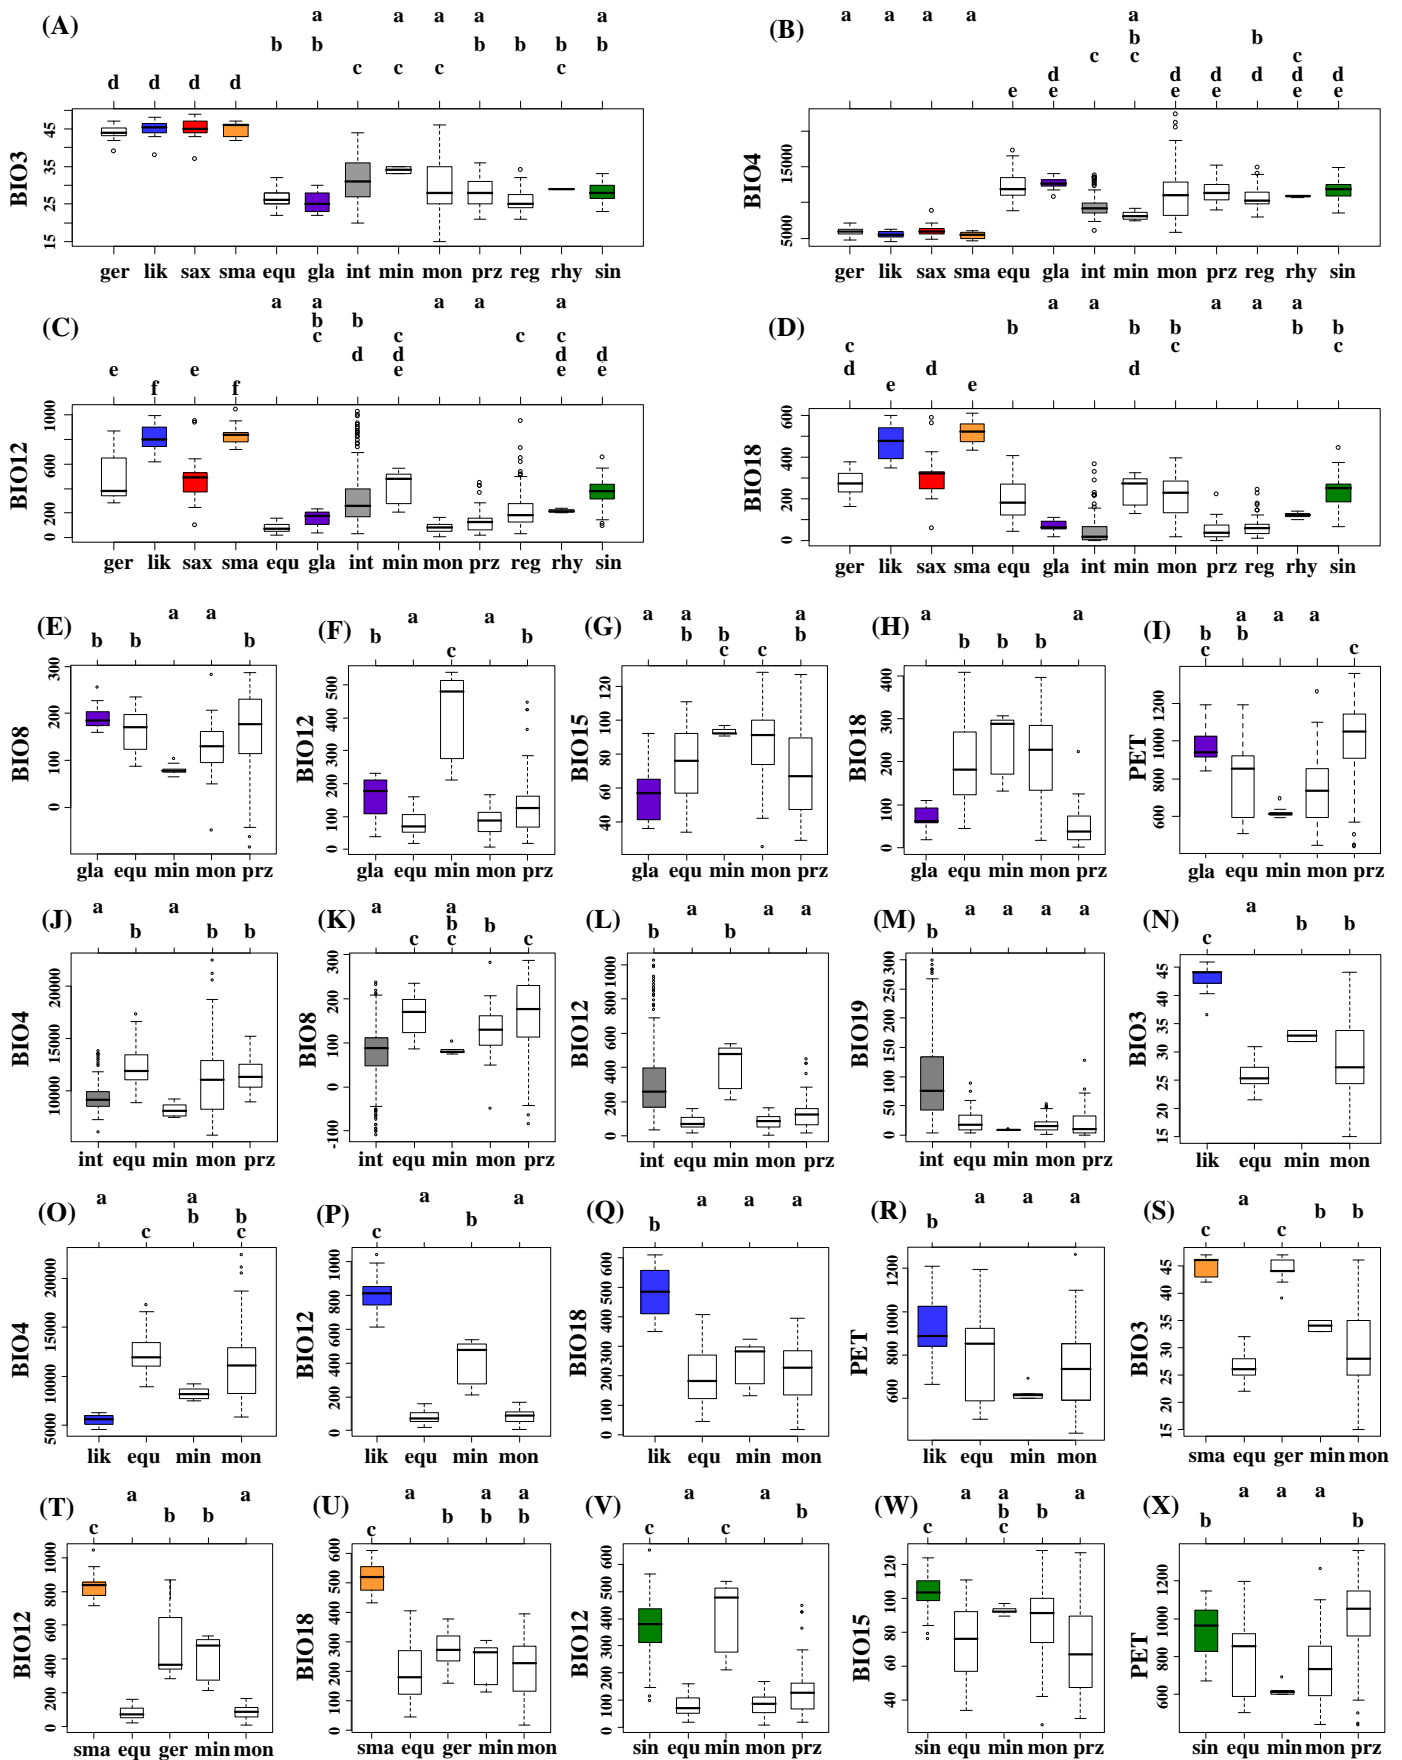

**Fig. S5** Boxplots showing variation of bioclim variables among the studied *Ephedra* species. A-D: comparisons among 13 taxa; E-X: comparisons between allotetraploids and their putative progenitors. The allotetraploids are shown in color. The statistical differences were assessed by the Tukey's HSD test. Significant differences ( $P < 0.05$ ) between species are indicated by different letters above the boxes. equ, *E. equisetina*; ger, *E. gerardiana*; gla, *E. glauca*; int, *E. intermedia*; lik, *E. likiangensis*; min, *E. minuta*; mon, *E. monosperma*; prz, *E. przewalskii*; reg, *E. regeliana*; rhy, *E. rhytidosperra*; sax, *E. saxatilis*; sma, *E. saxatilis* var. *mairei*; sin, *E. sinica*.
