# Supplementary material
Source: PubMed Central journal article supplement (PMC7168403)

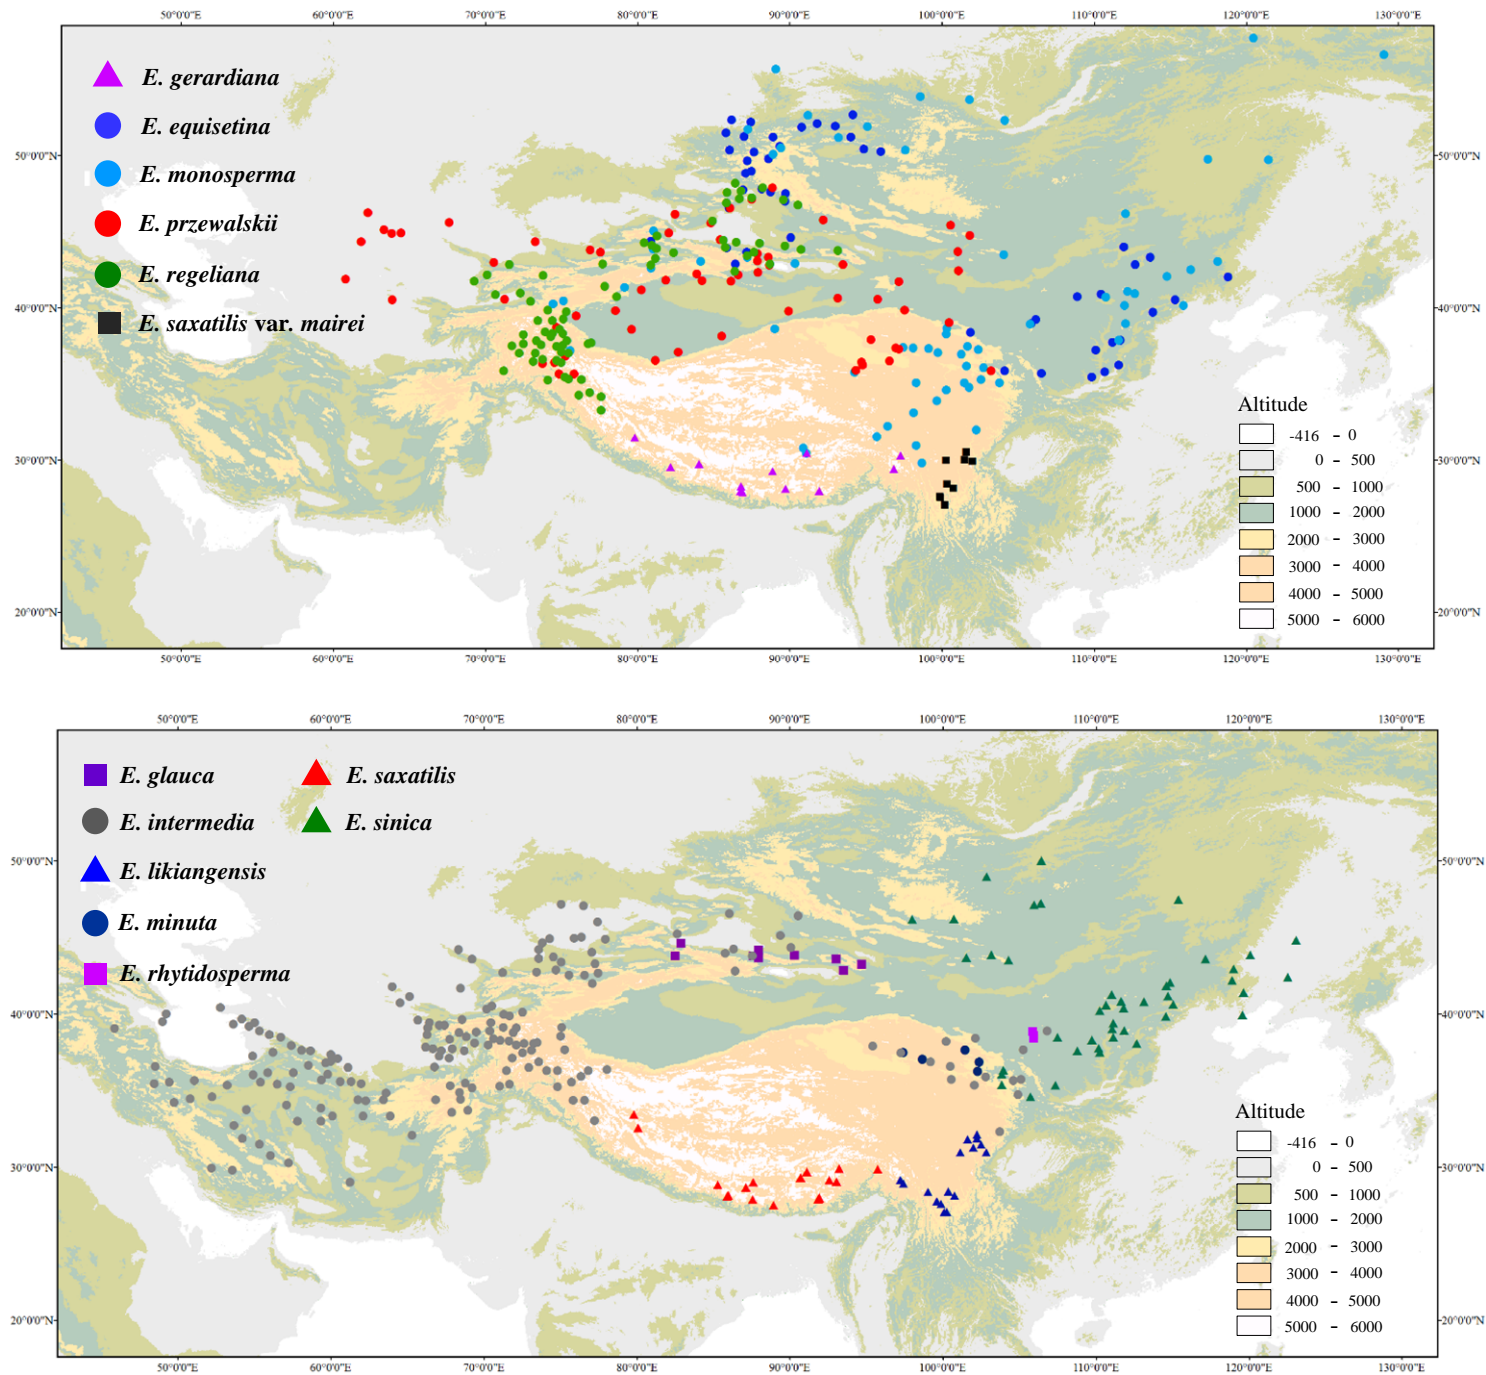

**Fig. S2** Sampling locations for the statistic analysis of ecological differentiation.

Supplement: MEC-25-1192-s002.pdf [file MEC-25-1192-s002.pdf]
